# Supplementary material
Source: PubMed Central journal article supplement (PMC6751486)
Supplement: JZUSB20-0803-ESM.pdf [file JZUSB20-0803-ESM.pdf]

## Analysis of cardiovascular disease-related NF- $\kappa$ B-regulated genes and microRNAs in TNF $\alpha$ -treated primary mouse vascular endothelial cells<sup>\*#</sup>

Hui ZHU<sup>1</sup>, Yun LI<sup>1</sup>, Mao-xian WANG<sup>1</sup>, Ju-hong WANG<sup>1</sup>, Wen-xin DU<sup>2</sup>, Fei ZHOU<sup>†‡1</sup>

<sup>1</sup>*School of Food Engineering and Biotechnology, Hanshan Normal University, Chaozhou 521041, China*

<sup>2</sup>*Shandong Center for Drug and Food Evaluation & Certification, Jinan 250014, China*

<sup>†</sup>E-mail: zhoufei1200@163.com

For identification of NF- $\kappa$ B-regulated genes, the pMVECs were treated by 30 ng/ml TNF $\alpha$  to activate NF- $\kappa$ B. 30 nM *Rela* siRNA was used to repress NF- $\kappa$ B activity that was activated by TNF $\alpha$ . The NF- $\kappa$ B activity in pMVECs were assessed by qPCR assay to detect the expressions of *Rela* and two well-known NF- $\kappa$ B-regulated genes, *Cxcl10* and *Vcam1*. The RNA samples from the qualified pMVECs with different NF- $\kappa$ B activity were analyzed with Genechip assay. As a result, 175 genes were markedly regulated in the TNF $\alpha$ -treated pMVECs in comparison with control cells (fold change  $\geq 1.5$ ). Among these genes, as shown in [Table S1](#), the expressions of 45 TNF $\alpha$ -increased and 32 TNF $\alpha$ -inhibited genes were markedly antagonized by *Rela* siRNA (fold change  $\geq 1.2$ ).

**Table S1 NF- $\kappa$ B-regulated genes in the TNF $\alpha$ -treated pMVECs**

|              | Gene             | Fold change |         | Gene            | Fold change |         |
|--------------|------------------|-------------|---------|-----------------|-------------|---------|
|              |                  | T vs. C     | T vs. S |                 | T vs. C     | T vs. S |
| Upregulation | <i>Fosb</i>      | 1.547       | -2.998  | <i>Snord71</i>  | 2.488       | -1.517  |
|              | <i>Nr4a1</i>     | 1.873       | -2.743  | <i>Snord2</i>   | 1.594       | -1.511  |
|              | <i>Ppan</i>      | 1.934       | -2.323  | <i>Tmem200b</i> | 1.742       | -1.502  |
|              | <i>Fos</i>       | 1.959       | -2.302  | <i>Olfir480</i> | 1.498       | -1.498  |
|              | <i>Olfir1047</i> | 1.841       | -2.123  | <i>Tnf</i>      | 1.913       | -1.496  |
|              | <i>Dkk2</i>      | 1.641       | -1.958  | <i>Spry1</i>    | 2.151       | -1.467  |
|              | <i>Egr1</i>      | 2.627       | -1.933  | <i>Cldn1</i>    | 1.561       | -1.459  |

|                       |                      |        |        |                      |        |        |
|-----------------------|----------------------|--------|--------|----------------------|--------|--------|
|                       | <i>H2-T10</i>        | 2.314  | -1.874 | <i>Btg2</i>          | 1.612  | -1.383 |
|                       | <i>Spon1</i>         | 1.822  | -1.822 | <i>Dgkg</i>          | 1.753  | -1.424 |
|                       | <i>Vmn1r94</i>       | 1.568  | -1.714 | <i>Map1lc3b</i>      | 1.881  | -1.407 |
|                       | <i>Jun</i>           | 1.597  | -1.707 | <i>Antxr1</i>        | 1.548  | -1.381 |
|                       | <i>Snora30</i>       | 1.814  | -1.672 | <i>Ccl3</i>          | 1.633  | -1.373 |
|                       | <i>Angpt2</i>        | 1.657  | -1.657 | <i>Syt8</i>          | 1.675  | -1.371 |
|                       | <i>Gstp1</i>         | 1.645  | -1.645 | <i>Bmp4</i>          | 1.556  | -1.556 |
|                       | <i>Xdh</i>           | 1.579  | -1.579 | <i>Zfp36</i>         | 2.105  | -1.541 |
|                       | <i>Olf490</i>        | 1.652  | -1.562 | <i>Clca6</i>         | 1.500  | -1.523 |
|                       | <i>Oog1</i>          | 1.560  | -1.560 | <i>Oas1e</i>         | 1.610  | -1.262 |
|                       | <i>Tcf23</i>         | 1.647  | -1.524 | <i>Dusp8</i>         | 1.584  | -1.261 |
|                       | <i>Itpr3</i>         | 1.505  | -1.520 | <i>Ier3</i>          | 1.586  | -1.254 |
|                       | <i>Snord53</i>       | 1.545  | -1.329 | <i>Olf1109</i>       | 1.739  | -1.241 |
|                       | <i>Nfkbia</i>        | 2.063  | -1.321 | <i>Cox7b</i>         | 1.573  | -1.222 |
|                       | <i>9930111J21Rik</i> | 1.668  | -1.227 | <i>3000002C10Rik</i> | 1.499  | -1.453 |
|                       | <i>1700084J12Rik</i> | 1.567  | -1.392 |                      |        |        |
| <b>Downregulation</b> | <i>Olf775</i>        | -1.574 | 1.230  | <i>Sprr1a</i>        | -2.428 | 1.391  |
|                       | <i>Alms1-ps2</i>     | -1.528 | 1.230  | <i>Cd200</i>         | -1.507 | 1.482  |
|                       | <i>Olf1463</i>       | -1.842 | 1.230  | <i>Krt18</i>         | -1.691 | 1.488  |
|                       | <i>Il11ra1</i>       | -1.925 | 1.253  | <i>Ahcy</i>          | -2.362 | 1.494  |
|                       | <i>Unc93a</i>        | -1.990 | 1.256  | <i>H2-M10.5</i>      | -1.496 | 1.496  |
|                       | <i>Myom1</i>         | -1.719 | 1.261  | <i>Wisp1</i>         | -1.500 | 1.632  |
|                       | <i>Fem1a</i>         | -1.803 | 1.276  | <i>Cadm4</i>         | -1.586 | 1.692  |
|                       | <i>Snrpd2</i>        | -1.716 | 1.282  | <i>Klk1b24</i>       | -1.708 | 1.708  |
|                       | <i>Apol7b</i>        | -1.522 | 1.314  | <i>Defb35</i>        | -1.932 | 1.742  |
|                       | <i>Grhl2</i>         | -1.745 | 1.335  | <i>Ptpla</i>         | -1.565 | 1.971  |
|                       | <i>Sult2a2</i>       | -1.572 | 1.384  | <i>Rpl23</i>         | -1.946 | 2.061  |
|                       | <i>Usmg5</i>         | -1.638 | 2.246  | <i>Srpx2</i>         | -1.952 | 2.311  |
|                       | <i>2010005H15Rik</i> | -1.542 | 1.315  | <i>Gm10139</i>       | -2.049 | 1.685  |
|                       | <i>4930570D08Rik</i> | -1.913 | 4.062  | <i>Gm4871</i>        | -1.681 | 2.069  |
|                       | <i>1700010D01Rik</i> | -1.546 | 1.546  | <i>Gm5848</i>        | -2.202 | 1.525  |
|                       | <i>2210418O10Rik</i> | -1.511 | 1.246  | <i>Gm17758</i>       | -1.518 | 1.700  |

Note: C, control pMVECs. T, TNF $\alpha$ -treated pMVECs. S, siRNA-interfered pMVECs
